# Supplementary material for: DNA Barcode Gap Analysis for Multiple Marker Genes for Phytoplankton Species Biodiversity in Mediterranean Aquatic Ecosystems
Source: MDPI journal article supplement (doi:10.3390/biology11091277), 2022-08-27
Supplement: s1 [file Supplementary_tables_S1-S9.pdf › Supplementary_tables_S1-S9.pdf]

Table S1. Number of species with and without COI barcode for the families from transitional waters

| Phylum          | Family                     | Total Number of species | Number of species without barcode | Number of species with barcode | Percentage of gap in the libraries |
|-----------------|----------------------------|-------------------------|-----------------------------------|--------------------------------|------------------------------------|
| Bacillariophyta | <i>Achnanthaceae</i>       | 1                       | 1                                 | 0                              | 100,00                             |
| Bacillariophyta | <i>Cocconeidaceae</i>      | 4                       | 4                                 | 0                              | 100,00                             |
| Bacillariophyta | <i>Fragilariaceae</i>      | 8                       | 5                                 | 3                              | 62,50                              |
| Bacillariophyta | <i>Chaetocerotaceae</i>    | 12                      | 5                                 | 7                              | 41,67                              |
| Bacillariophyta | <i>Climacospheniaceae</i>  | 1                       | 1                                 | 0                              | 100,00                             |
| Bacillariophyta | <i>Coscinodiscaceae</i>    | 3                       | 2                                 | 1                              | 66,67                              |
| Bacillariophyta | <i>Stephanodiscaceae</i>   | 3                       | 2                                 | 1                              | 66,67                              |
| Bacillariophyta | <i>Bacillariaceae</i>      | 12                      | 5                                 | 7                              | 41,67                              |
| Bacillariophyta | <i>Diploneidaceae</i>      | 3                       | 3                                 | 0                              | 100,00                             |
| Bacillariophyta | <i>Pinnulariaceae</i>      | 1                       | 0                                 | 1                              | 0,00                               |
| Bacillariophyta | <i>Stauroneidaceae</i>     | 1                       | 1                                 | 0                              | 100,00                             |
| Bacillariophyta | <i>Amphipleuraceae</i>     | 2                       | 1                                 | 1                              | 50,00                              |
| Bacillariophyta | <i>Naviculaceae</i>        | 3                       | 2                                 | 1                              | 66,67                              |
| Bacillariophyta | <i>Pleurosigmataceae</i>   | 3                       | 3                                 | 0                              | 100,00                             |
| Bacillariophyta | <i>Hemiaulaceae</i>        | 2                       | 2                                 | 0                              | 100,00                             |
| Bacillariophyta | <i>Leptocylindraceae</i>   | 2                       | 1                                 | 1                              | 50,00                              |
| Bacillariophyta | <i>Cymbellaceae</i>        | 1                       | 1                                 | 0                              | 100,00                             |
| Bacillariophyta | <i>Gomphonemataceae</i>    | 1                       | 1                                 | 0                              | 100,00                             |
| Bacillariophyta | <i>Rhizosoleniaceae</i>    | 7                       | 6                                 | 1                              | 85,71                              |
| Bacillariophyta | <i>Paraliaceae</i>         | 1                       | 1                                 | 0                              | 100,00                             |
| Bacillariophyta | <i>Striatellaceae</i>      | 3                       | 2                                 | 1                              | 66,67                              |
| Bacillariophyta | <i>Rhopalodiaceae</i>      | 1                       | 1                                 | 0                              | 100,00                             |
| Bacillariophyta | <i>Melosiraceae</i>        | 2                       | 2                                 | 0                              | 100,00                             |
| Bacillariophyta | <i>Catenulaceae</i>        | 3                       | 3                                 | 0                              | 100,00                             |
| Bacillariophyta | <i>Skeletonemaceae</i>     | 4                       | 2                                 | 2                              | 50,00                              |
| Bacillariophyta | <i>Thalassiosiraceae</i>   | 1                       | 0                                 | 1                              | 0,00                               |
| Bacillariophyta | <i>Surirellaceae</i>       | 1                       | 1                                 | 0                              | 100,00                             |
| Bacillariophyta | <i>Licmophoraceae</i>      | 3                       | 3                                 | 0                              | 100,00                             |
| Bacillariophyta | <i>Tabellariaceae</i>      | 1                       | 1                                 | 0                              | 100,00                             |
| Bacillariophyta | <i>Thalassionemataceae</i> | 6                       | 5                                 | 1                              | 83,33                              |
| Bacillariophyta | <i>Mastogloiaceae</i>      | 1                       | 1                                 | 0                              | 100,00                             |
| Bacillariophyta | <i>Toxariaceae</i>         | 1                       | 1                                 | 0                              | 100,00                             |
| Ochrophyta      | <i>Chrysococcaceae</i>     | 1                       | 1                                 | 0                              | 100,00                             |
| Ochrophyta      | <i>Dinobryaceae</i>        | 4                       | 2                                 | 2                              | 50,00                              |
| Ochrophyta      | <i>Dictyochacea</i>        | 2                       | 2                                 | 0                              | 100,00                             |
| Ochrophyta      | <i>Pleurochloridaceae</i>  | 2                       | 2                                 | 0                              | 100,00                             |
| Ochrophyta      | <i>Pedinellaceae</i>       | 1                       | 1                                 | 0                              | 100,00                             |
| Myzozoa         | <i>Gymnodiniaceae</i>      | 6                       | 3                                 | 3                              | 50,00                              |
| Myzozoa         | <i>Polykrikaceae</i>       | 2                       | 2                                 | 0                              | 100,00                             |
| Myzozoa         | <i>Gyrodiniaceae</i>       | 3                       | 3                                 | 0                              | 100,00                             |
| Myzozoa         | <i>Amphidiniaceae</i>      | 4                       | 3                                 | 1                              | 75,00                              |

|               |                             |    |    |   |        |
|---------------|-----------------------------|----|----|---|--------|
| Myzozoa       | <i>Dinophysaceae</i>        | 1  | 0  | 1 | 0,00   |
| Myzozoa       | <i>Peridiniaceae</i>        | 4  | 1  | 3 | 25,00  |
| Myzozoa       | <i>Oxytoxaceae</i>          | 2  | 2  | 0 | 100,00 |
| Myzozoa       | <i>Heterocapsaceae</i>      | 4  | 4  | 0 | 100,00 |
| Myzozoa       | <i>Protoperidiniaceae</i>   | 13 | 13 | 0 | 100,00 |
| Myzozoa       | <i>Gonyaulacaceae</i>       | 6  | 2  | 4 | 33,33  |
| Myzozoa       | <i>Ceratiaceae</i>          | 2  | 2  | 0 | 100,00 |
| Myzozoa       | <i>Ostreopsidaceae</i>      | 3  | 0  | 3 | 0,00   |
| Myzozoa       | <i>Tovelliaceae</i>         | 1  | 1  | 0 | 100,00 |
| Myzozoa       | <i>Thoracosphaeraceae</i>   | 1  | 0  | 1 | 0,00   |
| Myzozoa       | <i>Oxyrrhinaceae</i>        | 1  | 1  | 0 | 100,00 |
| Myzozoa       | <i>Prorocentraceae</i>      | 14 | 6  | 8 | 42,86  |
| Cercozoa      | <i>Ebriaceae</i>            | 1  | 1  | 0 | 100,00 |
| Cyanobacteria | <i>Nostocaceae</i>          | 1  | 0  | 1 | 0,00   |
| Cyanobacteria | <i>Chroococcaceae</i>       | 5  | 5  | 0 | 100,00 |
| Cyanobacteria | <i>Microcystaceae</i>       | 4  | 3  | 1 | 75,00  |
| Cyanobacteria | <i>Gomphosphaeriaceae</i>   | 1  | 1  | 0 | 100,00 |
| Cyanobacteria | <i>Oscillatoriaceae</i>     | 5  | 5  | 0 | 100,00 |
| Cyanobacteria | <i>Coelosphaeriaceae</i>    | 3  | 3  | 0 | 100,00 |
| Cyanobacteria | <i>Merismopediaceae</i>     | 3  | 3  | 0 | 100,00 |
| Cyanobacteria | <i>Spirulinaceae</i>        | 2  | 2  | 0 | 100,00 |
| Euglenozoa    | <i>Astasiaceae</i>          | 1  | 1  | 0 | 100,00 |
| Euglenozoa    | <i>Eutreptiaceae</i>        | 3  | 2  | 1 | 66,67  |
| Euglenozoa    | <i>Phacidae</i>             | 2  | 2  | 0 | 100,00 |
| Euglenozoa    | <i>Euglenidae</i>           | 1  | 1  | 0 | 100,00 |
| Euglenozoa    | <i>Euglenaceae</i>          | 3  | 2  | 1 | 66,67  |
| Haptophyta    | <i>Chrysochromulinaceae</i> | 1  | 0  | 1 | 0,00   |
| Haptophyta    | <i>Coccolithaceae</i>       | 2  | 1  | 1 | 50,00  |
| Haptophyta    | <i>Noelaerhabdaceae</i>     | 1  | 1  | 0 | 100,00 |
| Haptophyta    | <i>Halopappaceae</i>        | 1  | 1  | 0 | 100,00 |
| Haptophyta    | <i>Phaeocystaceae</i>       | 1  | 1  | 0 | 100,00 |
| Haptophyta    | <i>Pontosphaeraceae</i>     | 1  | 1  | 0 | 100,00 |
| Haptophyta    | <i>Rhabdosphaeraceae</i>    | 2  | 2  | 0 | 100,00 |
| Charophyta    | <i>Desmidiaceae</i>         | 1  | 1  | 0 | 100,00 |
| Charophyta    | <i>Closteriaceae</i>        | 1  | 1  | 0 | 100,00 |
| Charophyta    | <i>Zygnemataceae</i>        | 2  | 2  | 0 | 100,00 |
| Cryptophyta   | <i>Geminigeraceae</i>       | 1  | 1  | 0 | 100,00 |
| Cryptophyta   | <i>Katablepharidaceae</i>   | 1  | 0  | 1 | 0,00   |

Table S2. Number of species with and without 16S barcode for the families from transitional waters

| Phylum          | Family                | Total Number of species | Number of species without barcode | Number of species with barcode | Percentage of gap in the libraries |
|-----------------|-----------------------|-------------------------|-----------------------------------|--------------------------------|------------------------------------|
| Bacillariophyta | <i>Achnanthaceae</i>  | 1                       | 0                                 | 1                              | 0,00                               |
| Bacillariophyta | <i>Cocconeidaceae</i> | 4                       | 4                                 | 0                              | 100,00                             |
| Bacillariophyta | <i>Fragilariaceae</i> | 8                       | 1                                 | 7                              | 12,50                              |

|                 |                                                  |    |    |   |        |
|-----------------|--------------------------------------------------|----|----|---|--------|
| Bacillariophyta | <i>Chaetocerotaceae</i>                          | 12 | 10 | 2 | 83,33  |
| Bacillariophyta | <i>Climacospheniaceae</i>                        | 1  | 1  | 0 | 100,00 |
| Bacillariophyta | <i>Coscinodiscaceae</i>                          | 3  | 2  | 1 | 66,67  |
| Bacillariophyta | <i>Stephanodiscaceae</i>                         | 3  | 1  | 2 | 33,33  |
| Bacillariophyta | <i>Bacillariaceae</i>                            | 12 | 6  | 6 | 50,00  |
| Bacillariophyta | <i>Diploneidaceae</i>                            | 3  | 3  | 0 | 100,00 |
| Bacillariophyta | <i>Pinnulariaceae</i>                            | 1  | 0  | 1 | 0,00   |
| Bacillariophyta | <i>Stauroneidaceae</i>                           | 1  | 1  | 0 | 100,00 |
| Bacillariophyta | <i>Amphipleuraceae</i>                           | 2  | 1  | 1 | 50,00  |
| Bacillariophyta | <i>Naviculaceae</i>                              | 3  | 2  | 1 | 66,67  |
| Bacillariophyta | <i>Pleurosigmataceae</i>                         | 3  | 3  | 0 | 100,00 |
| Bacillariophyta | <i>Hemiaulaceae</i>                              | 2  | 2  | 0 | 100,00 |
| Bacillariophyta | <i>Leptocylindraceae</i>                         | 2  | 1  | 1 | 50,00  |
| Bacillariophyta | <i>Cymbellaceae</i>                              | 1  | 1  | 0 | 100,00 |
| Bacillariophyta | <i>Gomphonemataceae</i>                          | 1  | 1  | 0 | 100,00 |
| Bacillariophyta | <i>Rhizosoleniaceae</i>                          | 7  | 5  | 2 | 71,43  |
| Bacillariophyta | <i>Paraliaceae</i>                               | 1  | 0  | 1 | 0,00   |
| Bacillariophyta | <i>Striatellaceae</i>                            | 3  | 3  | 0 | 100,00 |
| Bacillariophyta | <i>Rhopalodiaceae</i>                            | 1  | 1  | 0 | 100,00 |
| Bacillariophyta | <i>Melosiraceae</i>                              | 2  | 2  | 0 | 100,00 |
| Bacillariophyta | <i>Catenulaceae</i>                              | 3  | 0  | 3 | 0,00   |
| Bacillariophyta | <i>Skeletonemaceae</i>                           | 4  | 0  | 4 | 0,00   |
| Bacillariophyta | <i>Thalassiosiraceae</i>                         | 1  | 0  | 1 | 0,00   |
| Bacillariophyta | <i>Surirellaceae</i>                             | 1  | 1  | 0 | 100,00 |
| Bacillariophyta | <i>Licmophoraceae</i>                            | 3  | 3  | 0 | 100,00 |
| Bacillariophyta | <i>Tabellariaceae</i>                            | 1  | 0  | 1 | 0,00   |
| Bacillariophyta | <i>Thalassionemataceae</i>                       | 6  | 4  | 2 | 66,67  |
| Bacillariophyta | <i>Mastogloiaceae</i>                            | 1  | 1  | 0 | 100,00 |
| Bacillariophyta | <i>Toxariaceae</i>                               | 1  | 1  | 0 | 100,00 |
| Cercozoa        | <i>Ebriaceae</i>                                 | 1  | 1  | 0 | 100,00 |
| Cyanobacteria   | <i>Nostocaceae</i>                               | 1  | 0  | 1 | 0,00   |
| Cyanobacteria   | <i>Chroococcaceae</i>                            | 5  | 3  | 2 | 60,00  |
| Cyanobacteria   | <i>Microcystaceae</i>                            | 4  | 1  | 3 | 25,00  |
| Cyanobacteria   | <i>Gomphosphaeriaceae</i>                        | 1  | 0  | 1 | 0,00   |
| Cyanobacteria   | <i>Oscillatoriaceae</i>                          | 5  | 1  | 4 | 20,00  |
| Cyanobacteria   | <i>Coelosphaeriaceae</i>                         | 3  | 3  | 0 | 100,00 |
| Cyanobacteria   | <i>Merismopediaceae</i>                          | 3  | 1  | 2 | 33,33  |
| Cyanobacteria   | <i>Spirulinaceae</i>                             | 2  | 1  | 1 | 50,00  |
| Chlorophyta     | <i>Selenastraceae</i>                            | 4  | 4  | 0 | 100,00 |
| Chlorophyta     | <i>Scenedesmaceae</i>                            | 7  | 5  | 2 | 71,43  |
| Chlorophyta     | <i>Hydrodictyaceae</i>                           | 3  | 2  | 1 | 66,67  |
| Chlorophyta     | <i>Trebouxiophyceae</i><br><i>incertae sedis</i> | 3  | 3  | 0 | 100,00 |
| Chlorophyta     | <i>Oocystaceae</i>                               | 3  | 3  | 0 | 100,00 |
| Chlorophyta     | <i>Pyramimonadaceae</i>                          | 1  | 0  | 1 | 0,00   |
| Chlorophyta     | <i>Prasiolaceae</i>                              | 1  | 1  | 0 | 100,00 |

|             |                             |   |   |   |        |
|-------------|-----------------------------|---|---|---|--------|
| Chlorophyta | <i>Chlorodendraceae</i>     | 1 | 1 | 0 | 100,00 |
| Chlorophyta | <i>Chlamydomonadaceae</i>   | 2 | 1 | 1 | 50,00  |
| Euglenozoa  | <i>Astasiaceae</i>          | 1 | 1 | 0 | 100,00 |
| Euglenozoa  | <i>Eutreptiaceae</i>        | 3 | 1 | 2 | 33,33  |
| Euglenozoa  | <i>Phacidae</i>             | 2 | 1 | 1 | 50,00  |
| Euglenozoa  | <i>Euglenidae</i>           | 1 | 1 | 0 | 100,00 |
| Euglenozoa  | <i>Euglenaceae</i>          | 3 | 1 | 2 | 33,33  |
| Haptophyta  | <i>Chrysochromulinaceae</i> | 1 | 0 | 1 | 0,00   |
| Haptophyta  | <i>Coccolithaceae</i>       | 2 | 2 | 0 | 100,00 |
| Haptophyta  | <i>Noelaerhabdaceae</i>     | 1 | 1 | 0 | 100,00 |
| Haptophyta  | <i>Halopappaceae</i>        | 1 | 1 | 0 | 100,00 |
| Haptophyta  | <i>Phaeocystaceae</i>       | 1 | 1 | 0 | 100,00 |
| Haptophyta  | <i>Pontosphaeraceae</i>     | 1 | 1 | 0 | 100,00 |
| Haptophyta  | <i>Rhabdosphaeraceae</i>    | 2 | 1 | 1 | 50,00  |
| Charophyta  | <i>Desmidiaceae</i>         | 1 | 0 | 1 | 0,00   |
| Charophyta  | <i>Closteriaceae</i>        | 1 | 0 | 1 | 0,00   |
| Charophyta  | <i>Zygnemataceae</i>        | 2 | 1 | 1 | 50,00  |
| Cryptophyta | <i>Geminigeraceae</i>       | 1 | 0 | 1 | 0,00   |
| Cryptophyta | <i>Katablepharidaceae</i>   | 1 | 1 | 0 | 100,00 |

Table S3. Number of species with and without 18S barcode for the families from transitional waters

| Phylum          | Family                    | Total Number of species | Number of species without barcode | Number of species with barcode | Percentage of gap in the libraries |
|-----------------|---------------------------|-------------------------|-----------------------------------|--------------------------------|------------------------------------|
| Bacillariophyta | <i>Achnanthaceae</i>      | 1                       | 0                                 | 1                              | 0,00                               |
| Bacillariophyta | <i>Cocconeidaceae</i>     | 4                       | 2                                 | 2                              | 50,00                              |
| Bacillariophyta | <i>Fragilariaceae</i>     | 8                       | 1                                 | 7                              | 12,50                              |
| Bacillariophyta | <i>Chaetocerotaceae</i>   | 12                      | 2                                 | 10                             | 16,67                              |
| Bacillariophyta | <i>Climacospheniaceae</i> | 1                       | 1                                 | 0                              | 100,00                             |
| Bacillariophyta | <i>Coscinodiscaceae</i>   | 3                       | 1                                 | 2                              | 33,33                              |
| Bacillariophyta | <i>Stephanodiscaceae</i>  | 3                       | 1                                 | 2                              | 33,33                              |
| Bacillariophyta | <i>Bacillariaceae</i>     | 12                      | 1                                 | 11                             | 8,33                               |
| Bacillariophyta | <i>Diploneidaceae</i>     | 3                       | 2                                 | 1                              | 66,67                              |
| Bacillariophyta | <i>Pinnulariaceae</i>     | 1                       | 0                                 | 1                              | 0,00                               |
| Bacillariophyta | <i>Stauroneidaceae</i>    | 1                       | 0                                 | 1                              | 0,00                               |
| Bacillariophyta | <i>Amphipleuraceae</i>    | 2                       | 1                                 | 1                              | 50,00                              |
| Bacillariophyta | <i>Naviculaceae</i>       | 3                       | 2                                 | 1                              | 66,67                              |
| Bacillariophyta | <i>Pleurosigmataceae</i>  | 3                       | 2                                 | 1                              | 66,67                              |
| Bacillariophyta | <i>Hemiaulaceae</i>       | 2                       | 1                                 | 1                              | 50,00                              |
| Bacillariophyta | <i>Leptocylindraceae</i>  | 2                       | 0                                 | 2                              | 0,00                               |
| Bacillariophyta | <i>Cymbellaceae</i>       | 1                       | 0                                 | 1                              | 0,00                               |
| Bacillariophyta | <i>Gomphonemataceae</i>   | 1                       | 0                                 | 1                              | 0,00                               |
| Bacillariophyta | <i>Rhizosoleniaceae</i>   | 7                       | 2                                 | 5                              | 28,57                              |
| Bacillariophyta | <i>Paraliaceae</i>        | 1                       | 0                                 | 1                              | 0,00                               |
| Bacillariophyta | <i>Striatellaceae</i>     | 3                       | 0                                 | 3                              | 0,00                               |
| Bacillariophyta | <i>Rhopalodiaceae</i>     | 1                       | 0                                 | 1                              | 0,00                               |

|                 |                                                  |    |    |   |        |
|-----------------|--------------------------------------------------|----|----|---|--------|
| Bacillariophyta | <i>Melosiraceae</i>                              | 2  | 0  | 2 | 0,00   |
| Bacillariophyta | <i>Catenulaceae</i>                              | 3  | 0  | 3 | 0,00   |
| Bacillariophyta | <i>Skeletonemaceae</i>                           | 4  | 0  | 4 | 0,00   |
| Bacillariophyta | <i>Thalassiosiraceae</i>                         | 1  | 0  | 1 | 0,00   |
| Bacillariophyta | <i>Surirellaceae</i>                             | 1  | 1  | 0 | 100,00 |
| Bacillariophyta | <i>Licmophoraceae</i>                            | 3  | 0  | 3 | 0,00   |
| Bacillariophyta | <i>Tabellariaceae</i>                            | 1  | 1  | 0 | 100,00 |
| Bacillariophyta | <i>Thalassionemataceae</i>                       | 6  | 2  | 4 | 33,33  |
| Bacillariophyta | <i>Mastogloiaceae</i>                            | 1  | 1  | 0 | 100,00 |
| Bacillariophyta | <i>Toxariaceae</i>                               | 1  | 0  | 1 | 0,00   |
| Ochrophyta      | <i>Chrysococcaceae</i>                           | 1  | 1  | 0 | 100,00 |
| Ochrophyta      | <i>Dinobryaceae</i>                              | 4  | 2  | 2 | 50,00  |
| Ochrophyta      | <i>Dictyochacea</i>                              | 2  | 1  | 1 | 50,00  |
| Ochrophyta      | <i>Pleurochloridaceae</i>                        | 2  | 2  | 0 | 100,00 |
| Ochrophyta      | <i>Pedinellaceae</i>                             | 1  | 1  | 0 | 100,00 |
| Myzozoa         | <i>Gymnodiniaceae</i>                            | 6  | 3  | 3 | 50,00  |
| Myzozoa         | <i>Polykrikaceae</i>                             | 2  | 1  | 1 | 50,00  |
| Myzozoa         | <i>Gyrodiniaceae</i>                             | 3  | 1  | 2 | 33,33  |
| Myzozoa         | <i>Amphidiniaceae</i>                            | 4  | 2  | 2 | 50,00  |
| Myzozoa         | <i>Dinophysaceae</i>                             | 1  | 1  | 0 | 100,00 |
| Myzozoa         | <i>Peridiniaceae</i>                             | 4  | 1  | 3 | 25,00  |
| Myzozoa         | <i>Oxytoxaceae</i>                               | 2  | 2  | 0 | 100,00 |
| Myzozoa         | <i>Heterocapsaceae</i>                           | 4  | 1  | 3 | 25,00  |
| Myzozoa         | <i>Protoperidiniaceae</i>                        | 13 | 10 | 3 | 76,92  |
| Myzozoa         | <i>Gonyaulacaceae</i>                            | 6  | 2  | 4 | 33,33  |
| Myzozoa         | <i>Ceratiaceae</i>                               | 2  | 0  | 2 | 0,00   |
| Myzozoa         | <i>Ostreopsidaceae</i>                           | 3  | 0  | 3 | 0,00   |
| Myzozoa         | <i>Tovelliaceae</i>                              | 1  | 1  | 0 | 100,00 |
| Myzozoa         | <i>Thoracosphaeraceae</i>                        | 1  | 1  | 0 | 100,00 |
| Myzozoa         | <i>Oxyrrhinaceae</i>                             | 1  | 0  | 1 | 0,00   |
| Myzozoa         | <i>Prorocentraceae</i>                           | 14 | 8  | 6 | 57,14  |
| Cercozoa        | <i>Ebriaceae</i>                                 | 1  | 0  | 1 | 0,00   |
| Chlorophyta     | <i>Selenastraceae</i>                            | 4  | 3  | 1 | 75,00  |
| Chlorophyta     | <i>Scenedesmaceae</i>                            | 7  | 0  | 7 | 0,00   |
| Chlorophyta     | <i>Hydrodictyaceae</i>                           | 3  | 1  | 2 | 33,33  |
| Chlorophyta     | <i>Trebouxiophyceae</i><br><i>incertae sedis</i> | 3  | 3  | 0 | 100,00 |
| Chlorophyta     | <i>Oocystaceae</i>                               | 3  | 1  | 2 | 33,33  |
| Chlorophyta     | <i>Pyramimonadaceae</i>                          | 1  | 0  | 1 | 0,00   |
| Chlorophyta     | <i>Prasiolaceae</i>                              | 1  | 1  | 0 | 100,00 |
| Chlorophyta     | <i>Chlorodendraceae</i>                          | 1  | 0  | 1 | 0,00   |
| Chlorophyta     | <i>Chlamydomonadaceae</i>                        | 2  | 0  | 2 | 0,00   |
| Euglenozoa      | <i>Astasiaceae</i>                               | 1  | 0  | 1 | 0,00   |
| Euglenozoa      | <i>Eutreptiaceae</i>                             | 3  | 1  | 2 | 33,33  |
| Euglenozoa      | <i>Phacidae</i>                                  | 2  | 0  | 2 | 0,00   |
| Euglenozoa      | <i>Euglenidae</i>                                | 1  | 0  | 1 | 0,00   |

|             |                             |   |   |   |        |
|-------------|-----------------------------|---|---|---|--------|
| Euglenozoa  | <i>Euglenaceae</i>          | 3 | 0 | 3 | 0,00   |
| Haptophyta  | <i>Chrysochromulinaceae</i> | 1 | 0 | 1 | 0,00   |
| Haptophyta  | <i>Coccolithaceae</i>       | 2 | 2 | 0 | 100,00 |
| Haptophyta  | <i>Noelaerhabdaceae</i>     | 1 | 1 | 0 | 100,00 |
| Haptophyta  | <i>Halopappaceae</i>        | 1 | 1 | 0 | 100,00 |
| Haptophyta  | <i>Phaeocystaceae</i>       | 1 | 0 | 1 | 0,00   |
| Haptophyta  | <i>Pontosphaeraceae</i>     | 1 | 1 | 0 | 100,00 |
| Haptophyta  | <i>Rhabdosphaeraceae</i>    | 2 | 1 | 1 | 50,00  |
| Charophyta  | <i>Desmidiaceae</i>         | 1 | 0 | 1 | 0,00   |
| Charophyta  | <i>Closteriaceae</i>        | 1 | 0 | 1 | 0,00   |
| Charophyta  | <i>Zygnemataceae</i>        | 2 | 0 | 2 | 0,00   |
| Cryptophyta | <i>Geminigeraceae</i>       | 1 | 1 | 0 | 100,00 |
| Cryptophyta | <i>Katablepharidaceae</i>   | 1 | 0 | 1 | 0,00   |

Table S4. Number of species with and without COI barcode for the families from lakes

| Phylum          | Family                     | Total Number of species | Number of species without barcode | Number of species with barcode | Percentage of gap in the libraries |
|-----------------|----------------------------|-------------------------|-----------------------------------|--------------------------------|------------------------------------|
| Bacillariophyta | <i>Achnanthaceae</i>       | 1                       | 1                                 | 0                              | 100,00                             |
| Bacillariophyta | <i>Cocconeidaceae</i>      | 2                       | 2                                 | 0                              | 100,00                             |
| Bacillariophyta | <i>Catenulaceae</i>        | 2                       | 2                                 | 0                              | 100,00                             |
| Bacillariophyta | <i>Fragilariaceae</i>      | 8                       | 8                                 | 0                              | 100,00                             |
| Bacillariophyta | <i>Stephanodiscaceae</i>   | 6                       | 5                                 | 1                              | 83,33                              |
| Bacillariophyta | <i>Cymbellaceae</i>        | 2                       | 2                                 | 0                              | 100,00                             |
| Bacillariophyta | <i>Striatellaceae</i>      | 1                       | 1                                 | 0                              | 100,00                             |
| Bacillariophyta | <i>Bacillariaceae</i>      | 7                       | 4                                 | 3                              | 57,14                              |
| Bacillariophyta | <i>Pinnulariaceae</i>      | 1                       | 0                                 | 1                              | 0,00                               |
| Bacillariophyta | <i>Pleurosigmataceae</i>   | 2                       | 2                                 | 0                              | 100,00                             |
| Bacillariophyta | <i>Stauroneidaceae</i>     | 2                       | 2                                 | 0                              | 100,00                             |
| Bacillariophyta | <i>Naviculaceae</i>        | 3                       | 1                                 | 2                              | 33,33                              |
| Bacillariophyta | <i>Thalassiosiraceae</i>   | 1                       | 1                                 | 0                              | 100,00                             |
| Bacillariophyta | <i>Thalassionemataceae</i> | 1                       | 0                                 | 1                              | 0,00                               |
| Bacillariophyta | <i>Ulnariaceae</i>         | 1                       | 1                                 | 0                              | 100,00                             |
| Bacillariophyta | <i>Aulacoseiraceae</i>     | 1                       | 1                                 | 0                              | 100,00                             |
| Bacillariophyta | <i>Melosiraceae</i>        | 1                       | 1                                 | 0                              | 100,00                             |
| Ochrophyta      | <i>Dinobryaceae</i>        | 2                       | 0                                 | 2                              | 0,00                               |
| Ochrophyta      | <i>Mallomonadaceae</i>     | 1                       | 0                                 | 1                              | 0,00                               |
| Ochrophyta      | <i>Tribonemetaceae</i>     | 1                       | 1                                 | 0                              | 100,00                             |
| Myzozoa         | <i>Amphidiniaceae</i>      | 1                       | 1                                 | 0                              | 100,00                             |
| Myzozoa         | <i>Ceratiaceae</i>         | 1                       | 0                                 | 1                              | 0,00                               |
| Myzozoa         | <i>Phytodiniaceae</i>      | 1                       | 1                                 | 0                              | 100,00                             |
| Myzozoa         | <i>Gymnodiniaceae</i>      | 1                       | 0                                 | 1                              | 0,00                               |
| Myzozoa         | <i>Peridiniaceae</i>       | 3                       | 2                                 | 1                              | 66,67                              |
| Cyanobacteria   | <i>Nostocaceae</i>         | 2                       | 1                                 | 1                              | 50,00                              |
| Cyanobacteria   | <i>Merismopediaceae</i>    | 4                       | 3                                 | 1                              | 75,00                              |
| Cyanobacteria   | <i>Coelosphaeriaceae</i>   | 2                       | 2                                 | 0                              | 100,00                             |

|               |                           |   |   |   |        |
|---------------|---------------------------|---|---|---|--------|
| Cyanobacteria | <i>Microcystaceae</i>     | 3 | 2 | 1 | 66,67  |
| Cyanobacteria | <i>Chroococcaceae</i>     | 5 | 5 | 0 | 100,00 |
| Cyanobacteria | <i>Gomphosphaeriaceae</i> | 1 | 1 | 0 | 100,00 |
| Cyanobacteria | <i>Oscillatoriaceae</i>   | 2 | 2 | 0 | 100,00 |
| Cyanobacteria | <i>Microcoleaceae</i>     | 1 | 1 | 0 | 100,00 |
| Charophyta    | <i>Closteriaceae</i>      | 8 | 8 | 0 | 100,00 |
| Charophyta    | <i>Desmidiaceae</i>       | 6 | 6 | 0 | 100,00 |
| Charophyta    | <i>Elakatotrichaceae</i>  | 3 | 3 | 0 | 100,00 |
| Cryptophyta   | <i>Cryptomonadaceae</i>   | 1 | 0 | 1 | 0,00   |
| Cryptophyta   | <i>Pyrenomonadaceae</i>   | 1 | 0 | 1 | 0,00   |
| Euglenozoa    | <i>Euglenaceae</i>        | 2 | 2 | 0 | 100,00 |
| Euglenozoa    | <i>Phacidae</i>           | 3 | 3 | 0 | 100,00 |
| Euglenozoa    | <i>Euglenidae</i>         | 1 | 1 | 0 | 100,00 |

Table S5. Number of species with and without 16S barcode for the families from lakes

| Phylum          | Family                     | Total Number of species | Number of species without barcode | Number of species with barcode | Percentage of gap in the libraries |
|-----------------|----------------------------|-------------------------|-----------------------------------|--------------------------------|------------------------------------|
| Bacillariophyta | <i>Achnanthaceae</i>       | 1                       | 0                                 | 1                              | 0,00                               |
| Bacillariophyta | <i>Cocconeidaceae</i>      | 2                       | 2                                 | 0                              | 100,00                             |
| Bacillariophyta | <i>Catenulaceae</i>        | 2                       | 0                                 | 2                              | 0,00                               |
| Bacillariophyta | <i>Fragilariaceae</i>      | 8                       | 1                                 | 7                              | 12,50                              |
| Bacillariophyta | <i>Stephanodiscaceae</i>   | 6                       | 3                                 | 3                              | 50,00                              |
| Bacillariophyta | <i>Cymbellaceae</i>        | 2                       | 2                                 | 0                              | 100,00                             |
| Bacillariophyta | <i>Striatellaceae</i>      | 1                       | 1                                 | 0                              | 100,00                             |
| Bacillariophyta | <i>Bacillariaceae</i>      | 7                       | 5                                 | 2                              | 71,43                              |
| Bacillariophyta | <i>Pinnulariaceae</i>      | 1                       | 0                                 | 1                              | 0,00                               |
| Bacillariophyta | <i>Pleurosigmaaceae</i>    | 2                       | 2                                 | 0                              | 100,00                             |
| Bacillariophyta | <i>Stauroneidaceae</i>     | 2                       | 2                                 | 0                              | 100,00                             |
| Bacillariophyta | <i>Naviculaceae</i>        | 3                       | 1                                 | 2                              | 33,33                              |
| Bacillariophyta | <i>Thalassiosiraceae</i>   | 1                       | 0                                 | 1                              | 0,00                               |
| Bacillariophyta | <i>Thalassionemataceae</i> | 1                       | 0                                 | 1                              | 0,00                               |
| Bacillariophyta | <i>Ulnariaceae</i>         | 1                       | 1                                 | 0                              | 100,00                             |
| Bacillariophyta | <i>Aulacoseiraceae</i>     | 1                       | 0                                 | 1                              | 0,00                               |
| Bacillariophyta | <i>Melosiraceae</i>        | 1                       | 1                                 | 0                              | 100,00                             |
| Cyanobacteria   | <i>Nostocaceae</i>         | 2                       | 0                                 | 2                              | 0,00                               |
| Cyanobacteria   | <i>Merismopediaceae</i>    | 4                       | 2                                 | 2                              | 50,00                              |
| Cyanobacteria   | <i>Coelosphaeriaceae</i>   | 2                       | 0                                 | 2                              | 0,00                               |
| Cyanobacteria   | <i>Microcystaceae</i>      | 3                       | 1                                 | 2                              | 33,33                              |
| Cyanobacteria   | <i>Chroococcaceae</i>      | 5                       | 2                                 | 3                              | 40,00                              |
| Cyanobacteria   | <i>Gomphosphaeriaceae</i>  | 1                       | 1                                 | 0                              | 100,00                             |
| Cyanobacteria   | <i>Oscillatoriaceae</i>    | 2                       | 0                                 | 2                              | 0,00                               |
| Cyanobacteria   | <i>Microcoleaceae</i>      | 1                       | 0                                 | 1                              | 0,00                               |
| Chlorophyta     | <i>Chlamydomonadaceae</i>  | 3                       | 3                                 | 0                              | 100,00                             |
| Chlorophyta     | <i>Chlorococcaceae</i>     | 1                       | 1                                 | 0                              | 100,00                             |

|             |                                             |    |    |   |        |
|-------------|---------------------------------------------|----|----|---|--------|
| Chlorophyta | <i>Palmellaceae</i>                         | 1  | 1  | 0 | 100,00 |
| Chlorophyta | <i>Sphaerocystidaeae</i>                    | 1  | 1  | 0 | 100,00 |
| Chlorophyta | <i>Oocystaceae</i>                          | 6  | 5  | 1 | 83,33  |
| Chlorophyta | <i>Chlorellaceae</i>                        | 1  | 1  | 0 | 100,00 |
| Chlorophyta | <i>Hydrodictyceae</i>                       | 9  | 7  | 2 | 77,78  |
| Chlorophyta | <i>Chlorodendraceae</i>                     | 1  | 1  | 0 | 100,00 |
| Chlorophyta | <i>Trebouxioephyceae<br/>incertae sedis</i> | 5  | 5  | 0 | 100,00 |
| Chlorophyta | <i>Radiococcaceae</i>                       | 4  | 4  | 0 | 100,00 |
| Chlorophyta | <i>Schizochlamydaceae</i>                   | 1  | 1  | 0 | 100,00 |
| Chlorophyta | <i>Characiaceae</i>                         | 1  | 1  | 0 | 100,00 |
| Chlorophyta | <i>Treubariaceae</i>                        | 2  | 2  | 0 | 100,00 |
| Chlorophyta | <i>Schroederiaceae</i>                      | 2  | 1  | 1 | 50,00  |
| Chlorophyta | <i>Scenedesmaceae</i>                       | 21 | 18 | 3 | 85,71  |
| Chlorophyta | <i>Selenastraceae</i>                       | 11 | 7  | 4 | 63,64  |
| Chlorophyta | <i>Neochloridaceae</i>                      | 1  | 1  | 0 | 100,00 |
| Charophyta  | <i>Closteriaceae</i>                        | 8  | 6  | 2 | 75,00  |
| Charophyta  | <i>Desmidiaceae</i>                         | 6  | 3  | 3 | 50,00  |
| Charophyta  | <i>Elakatotrichaceae</i>                    | 3  | 3  | 0 | 100,00 |
| Cryptophyta | <i>Cryptomonadaceae</i>                     | 1  | 0  | 1 | 0,00   |
| Cryptophyta | <i>Pyrenomonadaceae</i>                     | 1  | 0  | 1 | 0,00   |
| Euglenozoa  | <i>Euglenaceae</i>                          | 2  | 1  | 1 | 50,00  |
| Euglenozoa  | <i>Phacidae</i>                             | 3  | 1  | 2 | 33,33  |
| Euglenozoa  | <i>Euglenidae</i>                           | 1  | 1  | 0 | 100,00 |

Table S6. Number of species with and without 18S barcode for the families from lakes

| Phylum          | Family                     | Total Number of species | Number of species without barcode | Number of species with barcode | Percentage of gap in the libraries |
|-----------------|----------------------------|-------------------------|-----------------------------------|--------------------------------|------------------------------------|
| Bacillariophyta | <i>Achnanthaceae</i>       | 1                       | 0                                 | 1                              | 0,00                               |
| Bacillariophyta | <i>Cocconeidaceae</i>      | 2                       | 1                                 | 1                              | 50,00                              |
| Bacillariophyta | <i>Catenulaceae</i>        | 2                       | 0                                 | 2                              | 0,00                               |
| Bacillariophyta | <i>Fragilariaceae</i>      | 8                       | 1                                 | 7                              | 12,50                              |
| Bacillariophyta | <i>Stephanodiscaceae</i>   | 6                       | 3                                 | 3                              | 50,00                              |
| Bacillariophyta | <i>Cymbellaceae</i>        | 2                       | 0                                 | 2                              | 0,00                               |
| Bacillariophyta | <i>Striatellaceae</i>      | 1                       | 0                                 | 1                              | 0,00                               |
| Bacillariophyta | <i>Bacillariaceae</i>      | 7                       | 0                                 | 7                              | 0,00                               |
| Bacillariophyta | <i>Pinnulariaceae</i>      | 1                       | 0                                 | 1                              | 0,00                               |
| Bacillariophyta | <i>Pleurosigmataceae</i>   | 2                       | 1                                 | 1                              | 50,00                              |
| Bacillariophyta | <i>Stauroneidaceae</i>     | 2                       | 0                                 | 2                              | 0,00                               |
| Bacillariophyta | <i>Naviculaceae</i>        | 3                       | 1                                 | 2                              | 33,33                              |
| Bacillariophyta | <i>Thalassiosiraceae</i>   | 1                       | 0                                 | 1                              | 0,00                               |
| Bacillariophyta | <i>Thalassionemataceae</i> | 1                       | 0                                 | 1                              | 0,00                               |
| Bacillariophyta | <i>Ulnariaceae</i>         | 1                       | 0                                 | 1                              | 0,00                               |
| Bacillariophyta | <i>Aulacoseiraceae</i>     | 1                       | 0                                 | 1                              | 0,00                               |
| Bacillariophyta | <i>Melosiraceae</i>        | 1                       | 0                                 | 1                              | 0,00                               |



|             |                                            |    |    |    |        |
|-------------|--------------------------------------------|----|----|----|--------|
| Ochrophyta  | <i>Dinobryaceae</i>                        | 2  | 0  | 2  | 0,00   |
| Ochrophyta  | <i>Mallomonadaceae</i>                     | 1  | 0  | 1  | 0,00   |
| Ochrophyta  | <i>Tribonemetaceae</i>                     | 1  | 0  | 1  | 0,00   |
| Myzozoa     | <i>Amphidiniaceae</i>                      | 1  | 1  | 0  | 100,00 |
| Myzozoa     | <i>Ceratiaceae</i>                         | 1  | 0  | 1  | 0,00   |
| Myzozoa     | <i>Phytodiniaceae</i>                      | 1  | 1  | 0  | 100,00 |
| Myzozoa     | <i>Gymnodiniaceae</i>                      | 1  | 0  | 1  | 0,00   |
| Myzozoa     | <i>Peridiniaceae</i>                       | 3  | 2  | 1  | 66,67  |
| Chlorophyta | <i>Chlamydomonadaceae</i>                  | 3  | 1  | 2  | 33,33  |
| Chlorophyta | <i>Chlorococcaceae</i>                     | 1  | 1  | 0  | 100,00 |
| Chlorophyta | <i>Palmellaceae</i>                        | 1  | 1  | 0  | 100,00 |
| Chlorophyta | <i>Sphaerocystidaeae</i>                   | 1  | 0  | 1  | 0,00   |
| Chlorophyta | <i>Oocystaceae</i>                         | 6  | 2  | 4  | 33,33  |
| Chlorophyta | <i>Chlorellaceae</i>                       | 1  | 0  | 1  | 0,00   |
| Chlorophyta | <i>Hydrodictyaceae</i>                     | 9  | 2  | 7  | 22,22  |
| Chlorophyta | <i>Chlorodendraceae</i>                    | 1  | 0  | 1  | 0,00   |
| Chlorophyta | <i>Trebouxiophyceae<br/>incertae sedis</i> | 5  | 5  | 0  | 100,00 |
| Chlorophyta | <i>Radiococcaceae</i>                      | 4  | 1  | 3  | 25,00  |
| Chlorophyta | <i>Schizochlamydeaceae</i>                 | 1  | 1  | 0  | 100,00 |
| Chlorophyta | <i>Characiaceae</i>                        | 1  | 0  | 1  | 0,00   |
| Chlorophyta | <i>Treubariaceae</i>                       | 2  | 0  | 2  | 0,00   |
| Chlorophyta | <i>Schroederiaceae</i>                     | 2  | 1  | 1  | 50,00  |
| Chlorophyta | <i>Scenedesmaceae</i>                      | 21 | 10 | 11 | 47,62  |
| Chlorophyta | <i>Selenastraceae</i>                      | 11 | 3  | 8  | 27,27  |
| Chlorophyta | <i>Neochloridaceae</i>                     | 1  | 0  | 1  | 0,00   |
| Charophyta  | <i>Closteriaceae</i>                       | 8  | 5  | 3  | 62,50  |
| Charophyta  | <i>Desmidiaceae</i>                        | 6  | 0  | 6  | 0,00   |
| Charophyta  | <i>Elakatotrichaceae</i>                   | 3  | 3  | 0  | 100,00 |
| Cryptophyta | <i>Cryptomonadaceae</i>                    | 1  | 0  | 1  | 0,00   |
| Cryptophyta | <i>Pyrenomonadaceae</i>                    | 1  | 0  | 1  | 0,00   |
| Euglenozoa  | <i>Euglenaceae</i>                         | 2  | 1  | 1  | 50,00  |
| Euglenozoa  | <i>Phacidae</i>                            | 3  | 0  | 3  | 0,00   |
| Euglenozoa  | <i>Euglenidae</i>                          | 1  | 1  | 0  | 100,00 |

Table S7. Number of species with and without COI barcode for the families from marine coastal waters

| Phylum          | Family                   | Total Number of species | Number of species without barcode | Number of species with barcode | Percentage of gap in the libraries |
|-----------------|--------------------------|-------------------------|-----------------------------------|--------------------------------|------------------------------------|
| Bacillariophyta | <i>Achnanthaceae</i>     | 3                       | 3                                 | 0                              | 100,00                             |
| Bacillariophyta | <i>Cocconeidaceae</i>    | 4                       | 4                                 | 0                              | 100,00                             |
| Bacillariophyta | <i>Fragilariaceae</i>    | 12                      | 9                                 | 3                              | 75,00                              |
| Bacillariophyta | <i>Hemiaulaceae</i>      | 6                       | 6                                 | 0                              | 100,00                             |
| Bacillariophyta | <i>Licmophoraceae</i>    | 6                       | 6                                 | 0                              | 100,00                             |
| Bacillariophyta | <i>Leptocylindraceae</i> | 4                       | 3                                 | 1                              | 75,00                              |
| Bacillariophyta | <i>Chaetocerotaceae</i>  | 32                      | 17                                | 15                             | 53,13                              |

|                 |                            |    |    |   |        |
|-----------------|----------------------------|----|----|---|--------|
| Bacillariophyta | <i>Attheyaceae</i>         | 1  | 1  | 0 | 100,00 |
| Bacillariophyta | <i>Stephanodiscaceae</i>   | 2  | 0  | 2 | 0,00   |
| Bacillariophyta | <i>Biddulphiaceae</i>      | 2  | 2  | 0 | 100,00 |
| Bacillariophyta | <i>Cymbellaceae</i>        | 1  | 1  | 0 | 100,00 |
| Bacillariophyta | <i>Gomphonemataceae</i>    | 1  | 1  | 0 | 100,00 |
| Bacillariophyta | <i>Climacospheniaceae</i>  | 2  | 2  | 0 | 100,00 |
| Bacillariophyta | <i>Bacillariaceae</i>      | 21 | 12 | 9 | 57,14  |
| Bacillariophyta | <i>Pleurosigmataceae</i>   | 5  | 5  | 0 | 100,00 |
| Bacillariophyta | <i>Naviculaceae</i>        | 10 | 7  | 3 | 70,00  |
| Bacillariophyta | <i>Diploneidaceae</i>      | 3  | 3  | 0 | 100,00 |
| Bacillariophyta | <i>Pinnulariaceae</i>      | 1  | 0  | 1 | 0,00   |
| Bacillariophyta | <i>Amphipleuraceae</i>     | 1  | 1  | 0 | 100,00 |
| Bacillariophyta | <i>Thalassionemataceae</i> | 8  | 7  | 1 | 87,50  |
| Bacillariophyta | <i>Melosiraceae</i>        | 1  | 1  | 0 | 100,00 |
| Bacillariophyta | <i>Skeletonemaceae</i>     | 6  | 3  | 3 | 50,00  |
| Bacillariophyta | <i>Thalassiosiraceae</i>   | 6  | 3  | 3 | 50,00  |
| Bacillariophyta | <i>Lauderiaceae</i>        | 2  | 2  | 0 | 100,00 |
| Bacillariophyta | <i>Striatellaceae</i>      | 2  | 2  | 0 | 100,00 |
| Bacillariophyta | <i>Entomoneidaceae</i>     | 2  | 2  | 0 | 100,00 |
| Bacillariophyta | <i>Surirellaceae</i>       | 1  | 1  | 0 | 100,00 |
| Bacillariophyta | <i>Paraliaceae</i>         | 1  | 1  | 0 | 100,00 |
| Bacillariophyta | <i>Lithodesmiaceae</i>     | 1  | 0  | 1 | 0,00   |
| Bacillariophyta | <i>Coscinodiscaceae</i>    | 4  | 2  | 2 | 50,00  |
| Bacillariophyta | <i>Triceratiaceae</i>      | 1  | 1  | 0 | 100,00 |
| Bacillariophyta | <i>Toxariaceae</i>         | 1  | 1  | 0 | 100,00 |
| Bacillariophyta | <i>Tabellariaceae</i>      | 1  | 1  | 0 | 100,00 |
| Bacillariophyta | <i>Rhizosoleniaceae</i>    | 17 | 16 | 1 | 94,12  |
| Bacillariophyta | <i>Catenulaceae</i>        | 3  | 3  | 0 | 100,00 |
| Bacillariophyta | <i>Asterolampraceae</i>    | 1  | 1  | 0 | 100,00 |
| Bacillariophyta | <i>Pleurochloridaceae</i>  | 2  | 2  | 0 | 100,00 |
| Ochrophyta      | <i>Chattonellaceae</i>     | 1  | 1  | 0 | 100,00 |
| Ochrophyta      | <i>Pedinellaceae</i>       | 1  | 1  | 0 | 100,00 |
| Ochrophyta      | <i>Dinobryaceae</i>        | 2  | 1  | 1 | 50,00  |
| Ochrophyta      | <i>Dictyochacea</i>        | 6  | 5  | 1 | 83,33  |
| Myzozoa         | <i>Gymnodiniaceae</i>      | 12 | 6  | 6 | 50,00  |
| Myzozoa         | <i>Brachidiniaceae</i>     | 1  | 1  | 0 | 100,00 |
| Myzozoa         | <i>Warnowiaceae</i>        | 1  | 1  | 0 | 100,00 |
| Myzozoa         | <i>Gyrodiniaceae</i>       | 3  | 3  | 0 | 100,00 |
| Myzozoa         | <i>Peridiniaceae</i>       | 6  | 2  | 4 | 33,33  |
| Myzozoa         | <i>Heterocapsaceae</i>     | 5  | 5  | 0 | 100,00 |
| Myzozoa         | <i>Oxytoxaceae</i>         | 13 | 13 | 0 | 100,00 |
| Myzozoa         | <i>Podolampadaceae</i>     | 3  | 3  | 0 | 100,00 |
| Myzozoa         | <i>Protopteridiniaceae</i> | 20 | 19 | 1 | 95,00  |
| Myzozoa         | <i>Dinophysaceae</i>       | 12 | 5  | 7 | 41,67  |
| Myzozoa         | <i>Gonyaulacaceae</i>      | 8  | 3  | 5 | 37,50  |
| Myzozoa         | <i>Ostreopsidaceae</i>     | 6  | 0  | 6 | 0,00   |

|               |                             |    |    |   |        |
|---------------|-----------------------------|----|----|---|--------|
| Myzozoa       | <i>Ceratiaceae</i>          | 11 | 11 | 0 | 100,00 |
| Myzozoa       | <i>Ceratocoryaceae</i>      | 1  | 0  | 1 | 0,00   |
| Myzozoa       | <i>Thoracosphaeraceae</i>   | 1  | 1  | 0 | 100,00 |
| Myzozoa       | <i>Prorocentraceae</i>      | 17 | 9  | 8 | 52,94  |
| Myzozoa       | <i>Tovelliaceae</i>         | 2  | 2  | 0 | 100,00 |
| Myzozoa       | <i>Kofoidiniaceae</i>       | 3  | 3  | 0 | 100,00 |
| Myzozoa       | <i>Noctilucaceae</i>        | 1  | 1  | 0 | 100,00 |
| Myzozoa       | <i>Pyrocystaceae</i>        | 1  | 1  | 0 | 100,00 |
| Myzozoa       | <i>Amphidiniaceae</i>       | 5  | 5  | 0 | 100,00 |
| Haptophyta    | <i>Rhabdosphaeraceae</i>    | 10 | 10 | 0 | 100,00 |
| Haptophyta    | <i>Syracosphaeraceae</i>    | 3  | 3  | 0 | 100,00 |
| Haptophyta    | <i>Coccolithaceae</i>       | 1  | 0  | 1 | 0,00   |
| Haptophyta    | <i>Calyptrorphaeraceae</i>  | 6  | 6  | 0 | 100,00 |
| Haptophyta    | <i>Halopappaceae</i>        | 1  | 1  | 0 | 100,00 |
| Haptophyta    | <i>Noelaerhabdaceae</i>     | 1  | 0  | 1 | 0,00   |
| Haptophyta    | <i>Phaeocystaceae</i>       | 1  | 1  | 0 | 100,00 |
| Haptophyta    | <i>Pontosphaeraceae</i>     | 1  | 1  | 0 | 100,00 |
| Haptophyta    | <i>Prymnesiaceae</i>        | 1  | 1  | 0 | 100,00 |
| Haptophyta    | <i>Chrysochromulinaceae</i> | 2  | 0  | 2 | 0,00   |
| Haptophyta    | <i>Ceratolithaceae</i>      | 2  | 2  | 0 | 100,00 |
| Charophyta    | <i>Closteriaceae</i>        | 1  | 1  | 0 | 100,00 |
| Charophyta    | <i>Desmidiaceae</i>         | 1  | 1  | 0 | 100,00 |
| Charophyta    | <i>Elakatotrichaceae</i>    | 1  | 1  | 0 | 100,00 |
| Cercozoa      | <i>Ebriaceae</i>            | 2  | 2  | 0 | 100,00 |
| Euglenozoa    | <i>Euglenaceae</i>          | 1  | 1  | 0 | 100,00 |
| Euglenozoa    | <i>Eutreptiaceae</i>        | 3  | 3  | 0 | 100,00 |
| Cyanobacteria | <i>Coelosphaeriaceae</i>    | 1  | 1  | 0 | 100,00 |
| Cyanobacteria | <i>Spirulinaceae</i>        | 1  | 1  | 0 | 100,00 |
| Cyanobacteria | <i>Oscillatoriaceae</i>     | 3  | 3  | 0 | 100,00 |
| Cryptophyta   | <i>Hilleaceae</i>           | 1  | 1  | 0 | 100,00 |
| Cryptophyta   | <i>Katablepharidaceae</i>   | 1  | 1  | 0 | 100,00 |
| Cryptophyta   | <i>Geminigeraceae</i>       | 3  | 3  | 0 | 100,00 |

Table S8. Number of species with and without 16S barcode for the families from marine coastal waters

| Phylum          | Family                   | Total Number of species | Number of species without barcode | Number of species with barcode | Percentage of gap in the libraries |
|-----------------|--------------------------|-------------------------|-----------------------------------|--------------------------------|------------------------------------|
| Bacillariophyta | <i>Achnanthaceae</i>     | 3                       | 0                                 | 3                              | 0,00                               |
| Bacillariophyta | <i>Cocconeidaceae</i>    | 4                       | 4                                 | 0                              | 100,00                             |
| Bacillariophyta | <i>Fragilariaceae</i>    | 12                      | 4                                 | 8                              | 33,33                              |
| Bacillariophyta | <i>Hemiaulaceae</i>      | 6                       | 6                                 | 0                              | 100,00                             |
| Bacillariophyta | <i>Leptocylindraceae</i> | 4                       | 3                                 | 1                              | 75,00                              |
| Bacillariophyta | <i>Licmophoraceae</i>    | 6                       | 6                                 | 0                              | 100,00                             |
| Bacillariophyta | <i>Chaetocerotaceae</i>  | 32                      | 27                                | 5                              | 84,38                              |
| Bacillariophyta | <i>Attheyaceae</i>       | 1                       | 1                                 | 0                              | 100,00                             |
| Bacillariophyta | <i>Stephanodiscaceae</i> | 2                       | 0                                 | 2                              | 0,00                               |

|                 |                             |    |    |    |        |
|-----------------|-----------------------------|----|----|----|--------|
| Bacillariophyta | <i>Biddulphiaceae</i>       | 2  | 2  | 0  | 100,00 |
| Bacillariophyta | <i>Cymbellaceae</i>         | 1  | 1  | 0  | 100,00 |
| Bacillariophyta | <i>Gomphonemataceae</i>     | 1  | 1  | 0  | 100,00 |
| Bacillariophyta | <i>Climacospheniaceae</i>   | 2  | 2  | 0  | 100,00 |
| Bacillariophyta | <i>Bacillariaceae</i>       | 21 | 8  | 13 | 38,10  |
| Bacillariophyta | <i>Pleurosigmataceae</i>    | 5  | 5  | 0  | 100,00 |
| Bacillariophyta | <i>Naviculaceae</i>         | 10 | 6  | 4  | 60,00  |
| Bacillariophyta | <i>Diploneidaceae</i>       | 3  | 3  | 0  | 100,00 |
| Bacillariophyta | <i>Pinnulariaceae</i>       | 1  | 0  | 1  | 0,00   |
| Bacillariophyta | <i>Amphipleuraceae</i>      | 1  | 1  | 0  | 100,00 |
| Bacillariophyta | <i>Thalassionemataceae</i>  | 8  | 5  | 3  | 62,50  |
| Bacillariophyta | <i>Melosiraceae</i>         | 1  | 1  | 0  | 100,00 |
| Bacillariophyta | <i>Skeletonemaceae</i>      | 6  | 1  | 5  | 16,67  |
| Bacillariophyta | <i>Thalassiosiraceae</i>    | 6  | 0  | 6  | 0,00   |
| Bacillariophyta | <i>Lauderiaceae</i>         | 2  | 1  | 1  | 50,00  |
| Bacillariophyta | <i>Striatellaceae</i>       | 2  | 2  | 0  | 100,00 |
| Bacillariophyta | <i>Entomoneidaceae</i>      | 2  | 2  | 0  | 100,00 |
| Bacillariophyta | <i>Surirellaceae</i>        | 1  | 1  | 0  | 100,00 |
| Bacillariophyta | <i>Paraliaceae</i>          | 1  | 0  | 1  | 0,00   |
| Bacillariophyta | <i>Lithodesmiaceae</i>      | 1  | 0  | 1  | 0,00   |
| Bacillariophyta | <i>Coscinodiscaceae</i>     | 4  | 1  | 3  | 25,00  |
| Bacillariophyta | <i>Triceratiaceae</i>       | 1  | 0  | 1  | 0,00   |
| Bacillariophyta | <i>Toxariaceae</i>          | 1  | 1  | 0  | 100,00 |
| Bacillariophyta | <i>Tabellariaceae</i>       | 1  | 0  | 1  | 0,00   |
| Bacillariophyta | <i>Rhizosoleniaceae</i>     | 17 | 14 | 3  | 82,35  |
| Bacillariophyta | <i>Catenulaceae</i>         | 3  | 0  | 3  | 0,00   |
| Bacillariophyta | <i>Asterolampraceae</i>     | 1  | 1  | 0  | 100,00 |
| Bacillariophyta | <i>Pleurochloridaceae</i>   | 2  | 2  | 0  | 100,00 |
| Haptophyta      | <i>Rhabdosphaeraceae</i>    | 10 | 10 | 0  | 100,00 |
| Haptophyta      | <i>Syracosphaeraceae</i>    | 3  | 2  | 1  | 66,67  |
| Haptophyta      | <i>Coccolithaceae</i>       | 1  | 1  | 0  | 100,00 |
| Haptophyta      | <i>Calyptrorphaeraceae</i>  | 6  | 6  | 0  | 100,00 |
| Haptophyta      | <i>Halopappaceae</i>        | 1  | 1  | 0  | 100,00 |
| Haptophyta      | <i>Noelaerhabdaceae</i>     | 1  | 1  | 0  | 100,00 |
| Haptophyta      | <i>Phaeocystaceae</i>       | 1  | 1  | 0  | 100,00 |
| Haptophyta      | <i>Pontosphaeraceae</i>     | 1  | 1  | 0  | 100,00 |
| Haptophyta      | <i>Prymnesiaceae</i>        | 1  | 0  | 1  | 0,00   |
| Haptophyta      | <i>Chrysochromulinaceae</i> | 2  | 0  | 2  | 0,00   |
| Haptophyta      | <i>Ceratolithaceae</i>      | 2  | 2  | 0  | 100,00 |
| Chlorophyta     | <i>Selenastraceae</i>       | 5  | 4  | 1  | 80,00  |
| Chlorophyta     | <i>Scenedesmaceae</i>       | 3  | 1  | 2  | 33,33  |
| Chlorophyta     | <i>Hydrodictyaceae</i>      | 1  | 1  | 0  | 100,00 |
| Chlorophyta     | <i>Chlamydomonadaceae</i>   | 1  | 1  | 0  | 100,00 |
| Chlorophyta     | <i>Chlorodendraceae</i>     | 1  | 1  | 0  | 100,00 |
| Chlorophyta     | <i>Chlorellaceae</i>        | 1  | 0  | 1  | 0,00   |
| Chlorophyta     | <i>Hydrodictyaceae</i>      | 1  | 0  | 1  | 0,00   |

|               |                                                  |   |   |   |        |
|---------------|--------------------------------------------------|---|---|---|--------|
| Chlorophyta   | <i>Pyramimonadaceae</i>                          | 1 | 0 | 1 | 0,00   |
| Chlorophyta   | <i>Trebouxiophyceae</i><br><i>incertae sedis</i> | 2 | 2 | 0 | 100,00 |
| Charophyta    | <i>Closteriaceae</i>                             | 1 | 0 | 1 | 0,00   |
| Charophyta    | <i>Desmidiaceae</i>                              | 1 | 1 | 0 | 100,00 |
| Charophyta    | <i>Elakatotrichaceae</i>                         | 1 | 1 | 0 | 100,00 |
| Cercozoa      | <i>Ebriaceae</i>                                 | 2 | 2 | 0 | 100,00 |
| Euglenozoa    | <i>Euglenaceae</i>                               | 1 | 0 | 1 | 0,00   |
| Euglenozoa    | <i>Eutreptiaceae</i>                             | 3 | 1 | 2 | 33,33  |
| Cyanobacteria | <i>Coelosphaeriaceae</i>                         | 1 | 1 | 0 | 100,00 |
| Cyanobacteria | <i>Spirulinaceae</i>                             | 1 | 0 | 1 | 0,00   |
| Cyanobacteria | <i>Oscillatoriaceae</i>                          | 3 | 0 | 3 | 0,00   |
| Cryptophyta   | <i>Hilleaceae</i>                                | 1 | 1 | 0 | 100,00 |
| Cryptophyta   | <i>Katablepharidaceae</i>                        | 1 | 1 | 0 | 100,00 |
| Cryptophyta   | <i>Geminigeraceae</i>                            | 3 | 0 | 3 | 0,00   |

Table S9. Number of species with and without 18S barcode for the families from marine coastal waters

| Phylum          | Family                     | Total Number of species | Number of species without barcode | Number of species with barcode | Percentage of gap in the libraries |
|-----------------|----------------------------|-------------------------|-----------------------------------|--------------------------------|------------------------------------|
| Bacillariophyta | <i>Achnanthaceae</i>       | 3                       | 0                                 | 3                              | 0,00                               |
| Bacillariophyta | <i>Cocconeidaceae</i>      | 4                       | 1                                 | 3                              | 25,00                              |
| Bacillariophyta | <i>Fragilariaceae</i>      | 12                      | 3                                 | 9                              | 25,00                              |
| Bacillariophyta | <i>Hemiaulaceae</i>        | 6                       | 2                                 | 4                              | 33,33                              |
| Bacillariophyta | <i>Leptocylindraceae</i>   | 4                       | 1                                 | 3                              | 25,00                              |
| Bacillariophyta | <i>Licmophoraceae</i>      | 6                       | 1                                 | 5                              | 16,67                              |
| Bacillariophyta | <i>Chaetocerotaceae</i>    | 32                      | 8                                 | 24                             | 25,00                              |
| Bacillariophyta | <i>Attheyaceae</i>         | 1                       | 0                                 | 1                              | 0,00                               |
| Bacillariophyta | <i>Stephanodiscaceae</i>   | 2                       | 0                                 | 2                              | 0,00                               |
| Bacillariophyta | <i>Biddulphiaceae</i>      | 2                       | 1                                 | 1                              | 50,00                              |
| Bacillariophyta | <i>Cymbellaceae</i>        | 1                       | 0                                 | 1                              | 0,00                               |
| Bacillariophyta | <i>Gomphonemataceae</i>    | 1                       | 0                                 | 1                              | 0,00                               |
| Bacillariophyta | <i>Climacospheniaceae</i>  | 2                       | 0                                 | 2                              | 0,00                               |
| Bacillariophyta | <i>Bacillariaceae</i>      | 21                      | 3                                 | 18                             | 14,29                              |
| Bacillariophyta | <i>Pleurosigmataceae</i>   | 5                       | 3                                 | 2                              | 60,00                              |
| Bacillariophyta | <i>Naviculaceae</i>        | 10                      | 5                                 | 5                              | 50,00                              |
| Bacillariophyta | <i>Diploneidaceae</i>      | 3                       | 1                                 | 2                              | 33,33                              |
| Bacillariophyta | <i>Pinnulariaceae</i>      | 1                       | 0                                 | 1                              | 0,00                               |
| Bacillariophyta | <i>Amphipleuraceae</i>     | 1                       | 1                                 | 0                              | 100,00                             |
| Bacillariophyta | <i>Thalassionemataceae</i> | 8                       | 3                                 | 5                              | 37,50                              |
| Bacillariophyta | <i>Melosiraceae</i>        | 1                       | 0                                 | 1                              | 0,00                               |
| Bacillariophyta | <i>Skeletonemaceae</i>     | 6                       | 0                                 | 6                              | 0,00                               |
| Bacillariophyta | <i>Thalassiosiraceae</i>   | 6                       | 1                                 | 5                              | 16,67                              |
| Bacillariophyta | <i>Lauderiaceae</i>        | 2                       | 1                                 | 1                              | 50,00                              |
| Bacillariophyta | <i>Striatellaceae</i>      | 2                       | 0                                 | 2                              | 0,00                               |
| Bacillariophyta | <i>Entomoneidaceae</i>     | 2                       | 0                                 | 2                              | 0,00                               |

|                 |                             |    |    |    |        |
|-----------------|-----------------------------|----|----|----|--------|
| Bacillariophyta | <i>Surirellaceae</i>        | 1  | 0  | 1  | 0,00   |
| Bacillariophyta | <i>Paraliaceae</i>          | 1  | 0  | 1  | 0,00   |
| Bacillariophyta | <i>Lithodesmiaceae</i>      | 1  | 0  | 1  | 0,00   |
| Bacillariophyta | <i>Coscinodiscaceae</i>     | 4  | 1  | 3  | 25,00  |
| Bacillariophyta | <i>Triceratiaceae</i>       | 1  | 0  | 1  | 0,00   |
| Bacillariophyta | <i>Toxariaceae</i>          | 1  | 0  | 1  | 0,00   |
| Bacillariophyta | <i>Tabellariaceae</i>       | 1  | 1  | 0  | 100,00 |
| Bacillariophyta | <i>Rhizosoleniaceae</i>     | 17 | 4  | 13 | 23,53  |
| Bacillariophyta | <i>Catenulaceae</i>         | 3  | 0  | 3  | 0,00   |
| Bacillariophyta | <i>Asterolampraceae</i>     | 1  | 0  | 1  | 0,00   |
| Bacillariophyta | <i>Pleurochloridaceae</i>   | 2  | 2  | 0  | 100,00 |
| Ochrophyta      | <i>Pedinellaceae</i>        | 1  | 1  | 0  | 100,00 |
| Ochrophyta      | <i>Dinobryaceae</i>         | 2  | 1  | 1  | 50     |
| Ochrophyta      | <i>Dictyochacea</i>         | 6  | 4  | 2  | 66,67  |
| Ochrophyta      | <i>Chattonellaceae</i>      | 1  | 1  | 0  | 100    |
| Myzozoa         | <i>Gymnodiniaceae</i>       | 12 | 3  | 9  | 25,00  |
| Myzozoa         | <i>Brachidiniaceae</i>      | 1  | 0  | 1  | 0,00   |
| Myzozoa         | <i>Warnowiaceae</i>         | 1  | 0  | 1  | 0,00   |
| Myzozoa         | <i>Gyrodiniaceae</i>        | 3  | 0  | 3  | 0,00   |
| Myzozoa         | <i>Peridiniaceae</i>        | 6  | 3  | 3  | 50,00  |
| Myzozoa         | <i>Heterocapsaceae</i>      | 5  | 1  | 4  | 20,00  |
| Myzozoa         | <i>Oxytoxaceae</i>          | 13 | 13 | 0  | 100,00 |
| Myzozoa         | <i>Podolampadaceae</i>      | 3  | 1  | 2  | 33,33  |
| Myzozoa         | <i>Protopteridiniaceae</i>  | 20 | 16 | 4  | 80,00  |
| Myzozoa         | <i>Dinophysaceae</i>        | 12 | 3  | 9  | 25,00  |
| Myzozoa         | <i>Gonyaulacaceae</i>       | 8  | 3  | 5  | 37,50  |
| Myzozoa         | <i>Ostreopsidaceae</i>      | 6  | 0  | 6  | 0,00   |
| Myzozoa         | <i>Ceratiaceae</i>          | 11 | 9  | 2  | 81,82  |
| Myzozoa         | <i>Ceratocoryaceae</i>      | 1  | 0  | 1  | 0,00   |
| Myzozoa         | <i>Thoracosphaeraceae</i>   | 1  | 0  | 1  | 0,00   |
| Myzozoa         | <i>Prorocentraceae</i>      | 17 | 9  | 8  | 52,94  |
| Myzozoa         | <i>Tovelliaceae</i>         | 2  | 2  | 0  | 100,00 |
| Myzozoa         | <i>Kofoidiniaceae</i>       | 3  | 1  | 2  | 33,33  |
| Myzozoa         | <i>Noctilucaeae</i>         | 1  | 0  | 1  | 0,00   |
| Myzozoa         | <i>Pyrocystaceae</i>        | 1  | 0  | 1  | 0,00   |
| Myzozoa         | <i>Amphidiniaceae</i>       | 5  | 3  | 2  | 60,00  |
| Haptophyta      | <i>Rhabdosphaeraceae</i>    | 10 | 10 | 0  | 100,00 |
| Haptophyta      | <i>Syracosphaeraceae</i>    | 3  | 2  | 1  | 66,67  |
| Haptophyta      | <i>Coccolithaceae</i>       | 1  | 1  | 0  | 100,00 |
| Haptophyta      | <i>Calyptosphaeraceae</i>   | 6  | 4  | 2  | 66,67  |
| Haptophyta      | <i>Halopappaceae</i>        | 1  | 1  | 0  | 100,00 |
| Haptophyta      | <i>Noelaerhabdaceae</i>     | 1  | 1  | 0  | 100,00 |
| Haptophyta      | <i>Phaeocystaceae</i>       | 1  | 0  | 1  | 0,00   |
| Haptophyta      | <i>Pontosphaeraceae</i>     | 1  | 1  | 0  | 100,00 |
| Haptophyta      | <i>Prymnesiaceae</i>        | 1  | 0  | 1  | 0,00   |
| Haptophyta      | <i>Chrysochromulinaceae</i> | 2  | 0  | 2  | 0,00   |

|             |                                                  |   |   |   |        |
|-------------|--------------------------------------------------|---|---|---|--------|
| Haptophyta  | <i>Ceratolithaceae</i>                           | 2 | 2 | 0 | 100,00 |
| Chlorophyta | <i>Selenastraceae</i>                            | 5 | 1 | 4 | 20,00  |
| Chlorophyta | <i>Scenedesmaceae</i>                            | 3 | 0 | 3 | 0,00   |
| Chlorophyta | <i>Hydrodictyaceae</i>                           | 1 | 0 | 1 | 0,00   |
| Chlorophyta | <i>Chlamydomonadaceae</i>                        | 1 | 0 | 1 | 0,00   |
| Chlorophyta | <i>Chlorodendraceae</i>                          | 1 | 0 | 1 | 0,00   |
| Chlorophyta | <i>Chlorellaceae</i>                             | 1 | 0 | 1 | 0,00   |
| Chlorophyta | <i>Hydrodictyaceae</i>                           | 1 | 0 | 1 | 0,00   |
| Chlorophyta | <i>Pyramimonadaceae</i>                          | 1 | 0 | 1 | 0,00   |
| Chlorophyta | <i>Trebouxiophyceae</i><br><i>incertae sedis</i> | 2 | 2 | 0 | 100,00 |
| Charophyta  | <i>Closteriaceae</i>                             | 1 | 0 | 1 | 0,00   |
| Charophyta  | <i>Desmidiaceae</i>                              | 1 | 1 | 0 | 100,00 |
| Charophyta  | <i>Elakatotrichaceae</i>                         | 1 | 1 | 0 | 100,00 |
| Cercozoa    | <i>Ebriaceae</i>                                 | 2 | 1 | 1 | 50,00  |
| Euglenozoa  | <i>Euglenaceae</i>                               | 1 | 0 | 1 | 0,00   |
| Euglenozoa  | <i>Eutreptiaceae</i>                             | 3 | 1 | 2 | 33,33  |
| Cryptophyta | <i>Hilleaceae</i>                                | 1 | 1 | 0 | 100,00 |
| Cryptophyta | <i>Katablepharidaceae</i>                        | 1 | 1 | 0 | 100,00 |
| Cryptophyta | <i>Geminigeraceae</i>                            | 3 | 2 | 1 | 66,67  |
